# Supplementary material for: Methane and carbon dioxide dynamics beneath the Greenland Ice Sheet: Insights from ice core basal materials
Source: Copernicus journal article supplement (doi:10.5194/egusphere-2025-6204), 2026-01-13
Supplement: Supplementary file 1 [file Table_S1_122025_for manuscript.xlsx]

## Sheet: CampCentury
MELTING FREEZING EXTRACTION
Ech.	Revised bot depth from bot 2023 (m)	Revised bot from surface 2023 (m)	Gas Content (mL/kg)	Gas Content (mL/kg)	Debris content (weight%)				Gas - mixing ratio											Gas - concentration (mol/kg de glace)
						d18O - 2023	dD - 2023		[N2]	[O2]	[Ar]	[CO2]	[CH4]	[N2]	[O2]	[Ar]	[CO2]	[CH4]		[N2]	[O2]	[Ar]	[CO2]	[CH4]	[N2]	[O2]	[Ar]	[CO2]	[CH4]
				+/-		‰	‰		%	%	%	%	ppm	± sd	± sd	± sd	± sd	± sd		mol/kg	mol/kg	mol/kg	mol/kg	mol/kg	± sd	± sd	± sd	± sd	± sd
CC 1041 A1 Top	26.55	1360.85	51.1115	2.99522	0	-25.5362	-195.613		77.9893	20.9443	0.965805	0.100334	1.87995	3.09638	1.00837	0.0415899	0.0182179	0.222494		0.00177874	0.000477687	2.20276e-05	2.28836e-06	4.2877e-09	0.000130056	3.58547e-05	1.67063e-06	4.38392e-07	6.05378e-10
CC 1041 B1 Top	26.15	1361.25	55.9809	2.55662	0	-26.433	-200.69		78.1207	20.831	0.965528	0.0825299	1.02773	2.41006	0.796063	0.0327613	0.0195577	0.0597249		0.00195148	0.000520366	2.41192e-05	2.06162e-06	2.56731e-09	0.000111572	3.11823e-05	1.44751e-06	5.10406e-07	1.80933e-10
CC 1041 C1 Top	25.8	1361.6	52.513	2.11584	0	-26.5284	-201.572		78.0392	20.9167	0.958802	0.0850751	0.999134	2.13184	0.681858	0.0272982	0.015782	0.102		0.00182868	0.000490139	2.24675e-05	1.99355e-06	2.34126e-09	9.29456e-05	2.51459e-05	1.14176e-06	3.87704e-07	2.79812e-10
CC 1043 A1 Top	23.75	1363.65	55.5993	2.12899	0	-26.9175	-205.275		78.1549	20.7879	0.969479	0.0875334	1.59292	2.02637	0.645454	0.0260647	0.023948	0.153218		0.00193902	0.000515747	2.40528e-05	2.17171e-06	3.95204e-09	9.37465e-05	2.52553e-05	1.15711e-06	6.15477e-07	4.4557e-10
CC 1043 B Top	23.2	1364.2	49.3012	2.20808	0	-27.466	-208.92		77.8175	21.1099	0.967903	0.104525	1.81794	2.36457	0.779509	0.0334641	0.0199716	0.175958		0.00171195	0.000464409	2.12935e-05	2.29951e-06	3.99941e-09	9.64223e-05	2.69051e-05	1.29547e-06	4.61388e-07	4.59831e-10
CC 1043 C1 Bot	22.85	1364.55	49.8592	2.81658	0	-28.416	-218.27		78.1637	20.7542	0.966667	0.115157	1.85947	2.98868	0.954901	0.0419638	0.0268853	0.296795		0.00173903	0.000461754	2.1507e-05	2.56209e-06	4.13706e-09	0.000122554	3.31332e-05	1.63579e-06	6.28313e-07	7.63613e-10
CC 1043 D2 Top	22.4	1365	40.7338	2.10117	0	-27.156	-207.32		77.5722	21.3013	0.991212	0.134992	2.01515	2.71278	0.940074	0.0384035	0.031865	0.0996639		0.00141	0.000387186	1.80169e-05	2.4537e-06	3.66287e-09	9.10492e-05	2.67024e-05	1.22922e-06	6.0699e-07	2.00807e-10
CC 1044 A2 Top	22.15	1365.25	46.4827	2.21597	0	-28.086	-214		77.9027	20.9937	0.97578	0.127489	1.77648	2.51633	0.831003	0.0346093	0.0204498	0.103815		0.00161586	0.000435451	2.02396e-05	2.64436e-06	3.68477e-09	9.65779e-05	2.69974e-05	1.26804e-06	4.47458e-07	2.60015e-10
CC 1044 B Bot	21.7	1365.7	36.7434	1.84902	0	-28.1025	-214.275		77.8664	21.0525	0.977636	0.103137	2.31547	2.65814	0.870231	0.0347864	0.0256829	0.161749		0.0012767	0.000345177	1.60293e-05	1.69103e-06	3.79645e-09	8.052e-05	2.23145e-05	1.0109e-06	4.40424e-07	3.22338e-10
CC 1045 A3 Top	20.7	1366.7	47.2895	2.15374	0	-27.706	-211.34		78.1957	20.7696	0.962259	0.0722278	1.43929	2.40913	0.771231	0.0311401	0.0215425	0.098522		0.00165009	0.000438279	2.03056e-05	1.52415e-06	3.03718e-09	9.4209e-05	2.55143e-05	1.16754e-06	4.71913e-07	2.52976e-10
CC 1045 C1 Bot	19.9	1367.5	55.8497	2.63379	0	-26.55	-202.377		77.9812	20.9636	0.961132	0.0937891	1.29372	2.49076	0.81536	0.0321072	0.0188481	0.0877715		0.00194343	0.000522451	2.39531e-05	2.33739e-06	3.22419e-09	0.0001149	3.18342e-05	1.42054e-06	4.93225e-07	2.66183e-10
CC 1046 A1 Bot	18.8	1368.6	57.2736	2.73398	0	-26.99	-205.1		77.6687	21.2345	0.968474	0.128205	1.11144	2.51794	0.84096	0.0341331	0.020906	0.0989568		0.00198499	0.000542693	2.47514e-05	3.27655e-06	2.84052e-09	0.000119043	3.3662e-05	1.54231e-06	5.6351e-07	3.04049e-10
CC 1046 C1 Top	18.4	1369	50.2753	2.47679	0	-26.74	-202.6		77.9246	21.0364	0.962346	0.0765469	0.928372	2.60905	0.825988	0.0364992	0.0188751	0.0528915		0.00174818	0.000471937	2.15896e-05	1.71728e-06	2.08274e-09	0.000108179	2.89508e-05	1.43812e-06	4.42763e-07	1.41973e-10
CC_1047_A1_top	17.65	1369.75	59.4282	2.78181	0	-26.595	-201.6		77.8296	21.1215	0.962507	0.0863095	1.0949	2.47102	0.815933	0.0314199	0.0147112	0.152447		0.00206393	0.000560112	2.55244e-05	2.28881e-06	2.90351e-09	0.000121303	3.39049e-05	1.48062e-06	4.11041e-07	4.65466e-10
CC 1047 A Top	17.6	1369.8	54.7706	2.51382	0	-26.6375	-201.9		77.7986	21.1107	0.974096	0.116325	1.32315	2.41831	0.817418	0.032609	0.020864	0.139775		0.00190142	0.000515952	2.38072e-05	2.843e-06	3.23381e-09	0.00010949	3.13185e-05	1.41248e-06	5.36532e-07	4.03337e-10
CC_1047_C_top	17.1	1370.3	58.404	2.27635	0	-28.83	-220.25		77.5141	21.4191	0.983237	0.0833818	1.56514	2.0044	0.88425	0.0343617	0.024775	0.158312		0.00202014	0.000558215	2.56247e-05	2.17306e-06	4.07901e-09	9.75147e-05	3.52896e-05	1.53151e-06	6.677e-07	4.81972e-10	Debris-free ice
CC_1047_D_top	16.8	1370.6	56.492	3.43691	0.0109123	-28.32	-216.4		79.0452	19.8464	0.983577	0.123926	7.54839	3.22532	0.991106	0.0394506	0.0194528	0.650609		0.0019926	0.000500296	2.47944e-05	3.12396e-06	1.90283e-08	0.000149748	3.89244e-05	1.75201e-06	5.16838e-07	1.98971e-09	Debris-rich ice
CC_1048_A_Top	16.05	1371.35	39.4228	2.26513	0.130636	-27.74	-211.6		81.3977	17.4815	1.03682	0.077571	62.5624	3.06649	0.826672	0.0428994	0.0208647	4.08879		0.00143192	0.000307528	1.82393e-05	1.3646e-06	1.10057e-07	9.95724e-05	2.26811e-05	1.3321e-06	3.84375e-07	8.55278e-09
CC_1048_B1_Top	15.6	1371.8	32.974	1.78003	0.25	-28.463	-217.3		80.5591	18.3127	1.04232	0.0813341	43.5694	2.87005	0.832374	0.0379081	0.0246981	2.78614		0.00118534	0.000269452	1.53367e-05	1.19675e-06	6.41077e-08	7.80378e-05	1.9128e-05	9.87129e-07	3.78746e-07	4.91641e-09
CC_1048_B2	15.3	1372.1	47.5463	3.01007	0.10223	-27.848	-213.08		79.2028	19.6499	1.00088	0.141896	43.9573	3.35754	1.02355	0.0480774	0.0267794	2.91341		0.00168041	0.000416904	2.12353e-05	3.01053e-06	9.32622e-08	0.000131127	3.38141e-05	1.78731e-06	5.99427e-07	7.15849e-09
CC_1049_C1_Top	14	1373.4	37.6821	1.48343	0.08	-28.4491	-217.145		79.8224	19.0268	1.02958	0.117366	36.3734	2.09311	0.609705	0.028327	0.0257901	1.65992		0.0013422	0.000319933	1.73122e-05	1.97349e-06	6.11614e-08	6.56532e-05	1.61522e-05	8.51513e-07	4.52258e-07	3.36118e-09
CC_1050_A_Top	13.05	1374.35	48.2237	2.95463	0.122971	-31.31	-240.7		80.7651	17.9796	1.02223	0.227168	57.8836	3.27075	0.881104	0.0440495	0.0298359	4.21759		0.00173797	0.0003869	2.19971e-05	4.8884e-06	1.24559e-07	0.000129719	2.9492e-05	1.67354e-06	6.71856e-07	1.08703e-08
CC_1050_B1_bot	12.4	1375	41.5524	2.28338	0.0999033	-33.443	-258.61		81.7956	16.7538	1.03224	0.407555	106.622	2.92561	0.827988	0.0411042	0.0461336	5.68707		0.00151665	0.000310648	1.91397e-05	7.55683e-06	1.97697e-07	0.00010024	2.38917e-05	1.34577e-06	8.93284e-07	1.17703e-08
CC_1051_B1	11.2	1376.2	59.5348	2.94762	0.00587027	-26.39	-199.8		79.292	19.6561	0.974636	0.0770234	1.96499	2.62081	0.821143	0.0324212	0.0188891	0.102217		0.00210648	0.000522186	2.58923e-05	2.04622e-06	5.22023e-09	0.000128857	3.41325e-05	1.52755e-06	5.2484e-07	3.16601e-10
CC_1051_B2_Bot	11	1376.4	44.4882	1.79791	0.197775	-28.1375	-214.463		81.309	16.937	1.01907	0.714591	202.288	2.15725	0.577969	0.0273131	0.0604472	8.98846		0.00161414	0.000336232	2.02304e-05	1.4186e-05	4.01581e-07	7.98741e-05	1.80571e-05	9.67788e-07	1.25826e-06	2.12343e-08
CC_1052_A_Bot	10.2	1377.2	41.316	1.93926	0.0950735	-31.3686	-241.721		81.5316	16.7831	1.02448	0.654823	58.1804	2.51047	0.64555	0.0352539	0.0601117	2.88832		0.00150315	0.000309421	1.88877e-05	1.20726e-05	1.07264e-07	8.587e-05	1.86454e-05	1.15057e-06	1.15394e-06	6.23289e-09
CC_1052_C_Bot	9.05	1378.35	43.5231	2.18928	0.263415	-30.4033	-234.35		80.6658	17.0247	1.03288	1.25146	250.655	2.68852	0.701762	0.0376639	0.113862	14.0762		0.00156663	0.000330641	2.00599e-05	2.43051e-05	4.86804e-07	9.66387e-05	2.13137e-05	1.29409e-06	2.2808e-06	3.24517e-08
CC_1053_A1_silty	8.85	1378.55	46.0378	2.35247	0.18525	-29.8767	-229.9		80.9848	16.7802	1.01807	1.18118	355.369	2.73116	0.711591	0.03901	0.106619	20.4317		0.0016637	0.000344723	2.09147e-05	2.42655e-05	7.3005e-07	0.000103821	2.28579e-05	1.41182e-06	2.25126e-06	4.98992e-08
CC_1053_A_Top	7.1	1380.3	55.0009	3.34151	0.0702334	-33.58	-260.1		82.0892	16.0797	1.0132	0.803801	139.958	3.25395	0.810395	0.0420505	0.0825488	8.55207		0.00201472	0.000394645	2.4867e-05	1.97277e-05	3.43499e-07	0.000147263	3.0996e-05	1.82284e-06	2.06373e-06	2.38811e-08
CC_1054_B1_Bot	6.9	1380.5	51.0582	2.96806	0.280659	-32.0983	-247.358		82.8772	15.0399	1.01871	1.04596	181.344	3.12932	0.683945	0.0392545	0.102385	11.0985		0.00188825	0.000342664	2.32099e-05	2.38308e-05	4.13169e-07	0.000131589	2.42045e-05	1.57811e-06	2.37548e-06	2.9394e-08
CC_1055_A_Top	6	1381.4	52.4759	3.05034	0.0602265	-33.3797	-257.22		81.8257	16.0846	1.01641	1.05947	137.199	3.1103	0.790648	0.041272	0.102713	8.56268		0.00191605	0.00037664	2.38006e-05	2.48089e-05	3.21269e-07	0.00013441	2.88742e-05	1.70829e-06	2.4449e-06	2.34697e-08
CC 1055 C1 Top	5.4	1382	51.7916	2.39014	0.075227	-32.7358	-252.229		81.4038	16.8793	1.01158	0.695727	95.1025	2.46324	0.66124	0.0334318	0.0580873	4.60003		0.00188132	0.000390096	2.33786e-05	1.60789e-05	2.19791e-07	0.000105675	2.39497e-05	1.37147e-06	1.38613e-06	1.2409e-08
CC 1055 C2 Bot	5.05	1382.35	53.7794	2.52136	0.1679	-31.8225	-245.05		81.2097	17.1966	1.00676	0.577528	92.6574	2.50015	0.683945	0.0340047	0.050223	4.53806		0.00194887	0.000412684	2.41601e-05	1.38595e-05	2.22359e-07	0.000111314	2.57127e-05	1.44714e-06	1.24804e-06	1.26895e-08
CC_1055_D1_Bot	4.9	1382.5	52.9538	2.13624	0.127399	-32.14	-247.64		81.6626	16.6322	1.00156	0.688746	148.049	2.16248	0.530082	0.0273318	0.0541797	6.5856		0.00192965	0.000393011	2.36664e-05	1.62747e-05	3.49832e-07	9.53114e-05	1.96833e-05	1.15396e-06	1.33525e-06	1.85328e-08
CC 1055 D2 Bot	4.75	1382.65	50.0889	2.47649		-32.1883	-247.683		81.6614	16.851	1.0107	0.466907	99.2924	2.64322	0.687032	0.0359013	0.0418569	4.77305		0.00182523	0.000376638	2.25902e-05	1.04359e-05	2.2193e-07	0.000109449	2.40278e-05	1.42133e-06	9.6543e-07	1.1961e-08
CC_1056_A_Bot	4.5	1382.9	50.1076	2.69542	0.18895	-32.83	-253.1		81.2622	15.8089	1.01984	1.89169	171.705	2.89041	0.661096	0.0358495	0.177182	10.094		0.00181698	0.00035348	2.2803e-05	4.22971e-05	3.83924e-07	0.000119428	2.2979e-05	1.41441e-06	4.06065e-06	2.6603e-08
CC 1056 A Bot	4.45	1382.95	45.9166	2.2751	0.118499	-32.8275	-253.15		82.0753	15.8052	1.02939	1.07463	153.527	2.64961	0.682258	0.0365231	0.100168	8.37815		0.00168167	0.000323838	2.10915e-05	2.20186e-05	3.14566e-07	0.000100581	2.18463e-05	1.32577e-06	2.12732e-06	2.03146e-08
CC 1056 B1 Bot	4.05	1383.35	52.6276	2.98036	0.148677	-32.385	-250.525		81.9426	15.5017	1.01317	1.52663	157.844	3.04005	0.712137	0.0429255	0.139354	9.03626		0.00192434	0.000364042	2.37933e-05	3.58514e-05	3.70681e-07	0.000131821	2.60755e-05	1.7728e-06	3.30456e-06	2.42455e-08
CC_1056_B2_Bot	3.75	1383.65	53.092	2.50835	0.136054	-33.8391	-263.108		82.2846	15.4769	1.00794	1.21515	153.161	2.53709	0.589852	0.0335802	0.106141	8.24336		0.00194942	0.000366666	2.38794e-05	2.87884e-05	3.62858e-07	0.000111511	2.18751e-05	1.41264e-06	2.60264e-06	2.33211e-08
CC 1057 A Top	3.05	1384.35	43.4966	2.07279	0.204338	-32.3605	-252.075		82.3082	12.4863	1.03699	4.1343	341.039	2.56294	0.520578	0.0333255	0.365218	17.5079		0.00159756	0.000242351	2.01274e-05	8.02444e-05	6.61939e-07	9.22608e-05	1.58007e-05	1.14869e-06	7.3384e-06	4.00001e-08
CC 1057 B Bot	2.45	1384.95	51.559	2.42484	0.184788	-32.9815	-255.467		82.9353	12.9222	1.02365	3.09047	282.823	2.52302	0.59204	0.0341073	0.242518	13.2358		0.0019081	0.000297302	2.35513e-05	7.11029e-05	6.50696e-07	0.00010772	2.10622e-05	1.39319e-06	5.6877e-06	3.46883e-08
CC_1057_C1_Top	2.1	1385.3	39.5781	2.06933	0.0413853	-28.3084	-216.396		82.2808	11.1438	1.06003	5.49243	226.12	2.81874	0.486299	0.0371618	0.49771	13.2249		0.00145315	0.00019681	1.87212e-05	9.70015e-05	3.99349e-07	9.2087e-05	1.34228e-05	1.16211e-06	9.00582e-06	2.77154e-08
CC 1057 C1 Bot	1.9	1385.5	32.9123	1.48705		-28.1228	-214.732		81.0788	9.89739	1.10299	7.88903	312.704	2.42174	0.386906	0.0339959	0.677447	17.335		0.00119076	0.000145358	1.6199e-05	0.000115862	4.5925e-07	6.60424e-05	8.9034e-06	8.88438e-07	1.03351e-05	3.078e-08
CC_1057_C_chem	1.65	1385.75	32.6321	1.62036	0.031072	-27.906	-213.1		84.0575	10.1679	1.08305	4.66563	255.154	2.68391	0.436247	0.0390137	0.413965	16.421		0.00122399	0.000148059	1.57708e-05	6.7938e-05	3.7154e-07	7.24042e-05	9.93113e-06	1.00529e-06	6.20786e-06	2.89905e-08
CC 1058 A1 Top	1.6	1385.8	27.019	1.28049	0.0316148	-27.751	-212.1		84.533	4.98122	1.19484	9.26718	232.868	2.55098	0.229671	0.0355497	0.79256	14.089		0.00101919	6.0057e-05	1.44058e-05	0.000111731	2.80762e-07	5.70463e-05	4.28193e-06	7.5197e-07	9.85979e-06	2.05906e-08
CC 1058 A2 Bot	1.25	1386.15	31.0978	1.88846	0.0890663	-28.2536	-216.436		86.5227	2.68516	1.16048	9.60336	279.322	3.28572	0.234687	0.0480571	0.960118	18.5298		0.00120065	3.72614e-05	1.61037e-05	0.000133263	3.87609e-07	8.39165e-05	4.65021e-06	1.17782e-06	1.35033e-05	3.02368e-08
CC 1058 A3 Bot	1.05	1386.35	31.1965	1.83488	0.0373506	-28.7233	-220.111		88.1393	2.29284	1.1835	8.36507	189.25	3.20216	0.169247	0.0499516	0.795108	12.593		0.00122697	3.19181e-05	1.64752e-05	0.000116448	2.63451e-07	8.19605e-05	3.46576e-06	1.22721e-06	1.11782e-05	2.08121e-08
CC_1058_B1_Bot	0.8	1386.6	27.8953	1.7446	0.0616292	-28.3686	-217.329		85.3356	1.6843	1.24665	11.3787	3538.1	3.36954	0.248559	0.0543313	1.11832	303.491		0.00106223	2.09657e-05	1.5518e-05	0.000141638	4.40413e-06	7.7221e-05	3.98114e-06	1.19392e-06	1.39591e-05	4.57895e-07
CC 1058 B2 Bot	0.5	1386.9	27.9799	1.48744	0.0710109	-27.5275	-210.3		87.7667	0.887952	1.37379	9.14775	8226.47	2.8876	0.141425	0.0494921	0.796654	459.049		0.00109581	1.10865e-05	1.71524e-05	0.000114214	1.02711e-05	6.64743e-05	2.17648e-06	1.09428e-06	1.00858e-05	6.66782e-07
CC 1058 B3 Bot	0.3	1387.1	15.1152	1.34541		-25.9727	-199.518		85.9332	1.85833	1.39716	8.70256	21086.6	4.83396	0.390744	0.0937109	1.10031	2578.66		0.000579608	1.25342e-05	9.42366e-06	5.86976e-05	1.42227e-05	5.97448e-05	3.3881e-06	1.10462e-06	7.19248e-06	2.10332e-06
CC 1059 1 Top	0.25	1387.15	6.57434	0.369454	0.256901	-25.5955	-196.836		86.6467	4.1734	1.62606	4.47607	30774.6	2.99229	1.02016	0.0651741	0.408764	5966.32		0.000254192	1.22433e-05	4.77031e-06	1.31313e-05	9.02822e-06	1.61435e-05	3.48646e-06	3.37869e-07	1.21312e-06	1.98592e-06
CC 1059 2 Top	0.15	1387.25	6.45313	0.36155	1.43673	-25.646	-197.74		87.274	2.98285	1.44606	6.62591	16707.1	3.04053	0.405199	0.0496266	0.6453	2053.84		0.000251312	8.58934e-06	4.16405e-06	1.90798e-05	4.81093e-06	1.61321e-05	1.49405e-06	2.46566e-07	1.90329e-06	7.00615e-07
CC 1059 3 Top	0.05	1387.35	12.8615	0.631578	1.58686	-25.606	-197.27		92.2562	2.58379	1.30342	3.12529	7312.84	2.70862	0.384119	0.0404579	0.256425	573.117		0.000529474	1.48288e-05	7.48056e-06	1.79366e-05	4.19697e-06	2.85032e-05	2.7131e-06	4.07774e-07	1.49957e-06	3.99079e-07
CCS 1060 C5	-1.2	1388.6	8.36274	0.399046	6	-24			93.408	0.700154	1.15473	0.657721	40793.6	2.64897	0.100317	0.0450802	0.107034	2216.63		0.000348571	2.61277e-06	4.30912e-06	2.45442e-06	1.52229e-05	1.81053e-05	4.614e-07	2.92373e-07	4.21268e-07	9.8746e-07
CCS 1061 D1	-1.75	1389.15	18.4039	0.903077	9	-28			94.5451	0.30821	0.686618	2.51003	19500.6	2.73593	0.0197295	0.0252039	0.228336	1037.52		0.000776438	2.53113e-06	5.63875e-06	2.06132e-05	1.60146e-05	4.09795e-05	2.36803e-07	3.65096e-07	1.94059e-06	1.00414e-06
CRUSHING EXTRACTION
CC 1048 B1 Top	15.3	1372.1							80.6227	18.2249	1.0246	0.122062		0.23582	0.231131	0.00476487	0.000772279
CC 1049 C1 Top	13.85	1373.55							79.6272	19.2131	1.02069	0.132105		0.033	0.045	0.0014	0.0033
CC 1055 D1 Bot	4.65	1382.75							81.6254	16.4537	0.976696	0.92546		0.213637	0.187691	0.0117682	0.0151571
CC 1056 B2 Bot	3.55	1383.85							82.6226	14.968	0.973963	1.40981		0.0744489	0.115172	0.00781407	0.0507568
CC 1058 B1 Bot	0.72	1386.68							87.5055	0.894748	1.23451	9.86779		0.203908	0.264994	0.00540056	0.516868

## Sheet: GRIP
Ech.	Depth Top from surface (m)	Depth mid from surface (m)	Depth mid from bot (m)		Gas Content (mL/kg)	Gas Content (mL/kg)	Debris content (weight%)	d18O - interpolation from Souchez et al. (1995)		Gas - mixing ratio											Gas - concentration (mol/kg de glace)
										[N2]	[O2]	[Ar]	[CO2]	[CH4]	[N2]	[O2]	[Ar]	[CO2]	[CH4]		[N2]	[O2]	[Ar]	[CO2]	[CH4]	[N2]	[O2]	[Ar]	[CO2]	[CH4]
						+/-		‰		%	%	%	%	ppm	± sd	± sd	± sd	± sd	± sd		mol/kg	mol/kg	mol/kg	mol/kg	mol/kg	± sd	± sd	± sd	± sd	± sd
GRIP_5497_A_Top	3022.8	3022.82	5.98		72.2063	3.5121	0.0034662	-34.13		78.4885	19.6815	0.953421	0.858381	181.737	2.02218	0.802258	0.0263185	0.0903838	13.8931		0.00252894	0.000634147	3.07197e-05	2.76575e-05	5.85568e-07	0.000153383	4.12862e-05	1.90681e-06	2.60751e-06	4.19596e-08
GRIP 5498_1_Top	3023.35	3023.38	5.425		89.8311	3.89938	0.00320616	-34.2		79.1221	19.5884	0.94815	0.335488	58.5137	1.82311	0.614534	0.0233718	0.183387	68.0562		0.00317163	0.000785207	3.80069e-05	1.34481e-05	2.34554e-07	0.000172516	3.90394e-05	2.11321e-06	7.33343e-06	2.7493e-07
GRIP_5498Bot	3023.75	3023.78	5.025		79.0314	2.7599		-36.02		78.9115	17.333	0.960462	2.73198	629.918	1.46169	0.504485	0.0210333	0.242359	33.5847		0.00278291	0.000611269	3.38718e-05	9.63464e-05	2.22148e-06	0.000122834	2.87409e-05	1.62939e-06	7.94044e-06	1.10932e-07
GRIP_5499_B_Top	3024.12	3024.15	4.65		63.7188	3.38571	0.0978287	-31.88		80.4717	14.0155	0.979301	4.40237	1310.77	2.23915	0.589268	0.0272748	0.459865	101.02		0.00228807	0.000398505	2.78446e-05	0.000125174	3.72693e-06	0.000150065	2.67276e-05	1.7773e-06	1.13755e-05	2.60131e-07
GRIP_5500A_Top	3024.45	3024.47	4.325		67.3371	2.09932		-26.82		80.1818	13.2266	0.984429	5.42036	1867.8	1.30911	0.317629	0.0186359	0.442631	90.6132		0.00240929	0.000397429	2.95799e-05	0.00016287	5.61233e-06	9.47463e-05	1.55369e-05	1.25197e-06	1.24372e-05	2.57941e-07
GRIP_5500_B_Top	3024.78	3024.81	3.995		64.7658	3.22782	0.0474626	-30.99		80.7732	14.2708	0.993447	3.82433	1381.09	2.09307	0.579506	0.0277522	0.406536	116.762		0.00233438	0.000412433	2.8711e-05	0.000110525	3.9914e-06	0.000143108	2.67621e-05	1.80918e-06	1.04768e-05	3.23575e-07
GRIP_5501_Bot	3025.34	3025.37	3.43		49.7234	2.63402	0.112791	-29.11		78.8756	11.2679	0.957093	8.56083	3385.16	2.22987	0.505181	0.028856	0.966732	267.058		0.00175009	0.000250013	2.1236e-05	0.000189948	7.511e-06	0.000115951	1.78596e-05	1.43549e-06	1.91121e-05	5.43105e-07
GRIP_5502_B_Top	3025.73	3025.76	3.04		56.2511	2.61358	0.722403	-27.51		80.593	12.06	0.99557	6.15824	1932.08	1.95393	0.462677	0.0250979	0.609652	149.782		0.00202295	0.000302716	2.49897e-05	0.000154577	4.84968e-06	0.00011614	1.85835e-05	1.43699e-06	1.36534e-05	3.59319e-07
GRIP_5503Top	3026.1	3026.12	2.675		63.5853	1.97266		-30.43		81.6157	11.2843	0.996114	5.90003	2038.09	1.29665	0.276199	0.0178453	0.482003	100.181		0.00231573	0.000320176	2.82634e-05	0.000167405	5.78279e-06	8.92732e-05	1.27675e-05	1.15306e-06	1.27999e-05	2.70863e-07
GRIP_5503Bot	3026.6	3026.62	2.175		59.0781	2.20156		-28.11		81.0221	10.2728	1.02452	7.41947	2611.26	1.55294	0.344206	0.0281106	0.671414	153.448		0.00213594	0.000270815	2.70087e-05	0.000195595	6.88392e-06	9.81834e-05	1.45054e-05	1.52431e-06	1.63011e-05	3.82186e-07
GRIP 5504A Top	3026.78	3026.81	1.995		63.6728	2.01165		-26.96		81.7563	10.242	1.01458	6.77292	2141.06	1.31826	0.261757	0.0171173	0.541728	100.927		0.00232292	0.000291004	2.88268e-05	0.000192437	6.08332e-06	9.08689e-05	1.20964e-05	1.13381e-06	1.43151e-05	2.67536e-07
GRIP_5504_A_Bot	3026.93	3026.95	1.845		44.2951	2.43112	0.155297	-28.26		81.5749	9.84372	0.987405	7.21661	3773.07	2.30507	0.461114	0.0280705	0.801823	287.827		0.00161239	0.000194569	1.95168e-05	0.000142642	7.45778e-06	0.000107837	1.45042e-05	1.27365e-06	1.39111e-05	5.0361e-07
GRIP 5504 Bot	3027.15	3027.18	1.625		53.544	1.98852		-26.76		80.4991	8.61717	1.00002	9.52497	3586.38	1.53506	0.402364	0.0269955	0.795532	183.682		0.00192336	0.000205889	2.38933e-05	0.000227579	8.5689e-06	8.80197e-05	1.43701e-05	1.33378e-06	1.72383e-05	3.91863e-07
GRIP_5505_C_Bot	3027.5	3027.53	1.27		43.4889	2.08133	0.174116	-26.96		80.9613	5.99803	0.945264	11.6746	4206.71	1.97689	0.247909	0.0266233	1.24437	330.193		0.00157114	0.000116398	1.83438e-05	0.000226558	8.16355e-06	9.13482e-05	7.67022e-06	1.1487e-06	2.17753e-05	6.09063e-07
GRIP 5505 Bot	3027.7	3027.72	1.075		48.4554	1.35346	0.170705	-26.81		82.8667	5.03271	1.03808	10.6724	3901.16	1.1286	0.10213	0.014825	0.846889	168.385		0.00179176	0.000108818	2.24457e-05	0.00023076	8.43519e-06	6.05045e-05	3.60228e-06	7.62448e-07	1.73414e-05	3.46174e-07
GRIP_5506_Top	3027.75	3027.78	1.02		33.1689	1.54564		-26.14		80.5056	4.34143	0.933223	13.6973	5223.24	1.92363	0.211998	0.021366	1.30151	363.839		0.00119156	6.42573e-05	1.38126e-05	0.000202734	7.7309e-06	6.77558e-05	4.85961e-06	7.34632e-07	1.6979e-05	4.95733e-07
GRIP 5506 Bot	3028.02	3028.05	0.755		48.1967	1.8102		-26.14		80.9768	2.18432	0.988882	15.3926	4574.43	1.4935	0.0618632	0.02036	1.3926	257.167		0.00174155	4.69777e-05	2.12677e-05	0.000331044	9.83812e-06	7.79432e-05	2.13963e-06	1.00384e-06	2.75389e-05	5.1274e-07
